# Supplementary material
Source: Springer Nature journal article supplement (https://www.springermedizin.de/resource/supplementary/12885_2014_4959_MOESM12_ESM.pdf/9467818)

**A**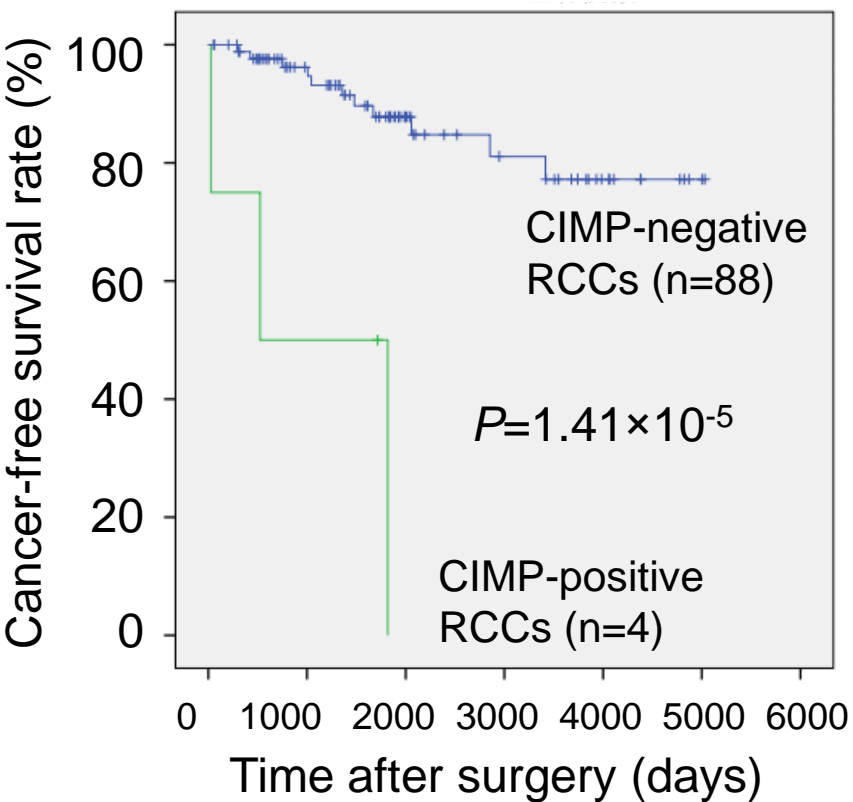**B**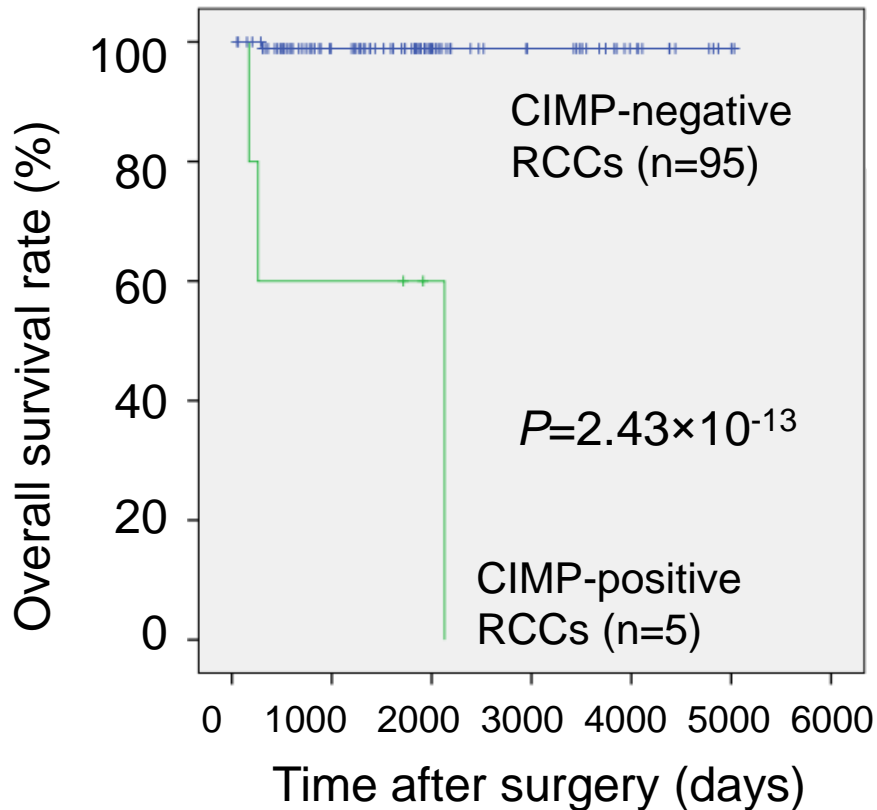

Supplement: MOESM12 [file 9467818]
